# Supplementary material
Source: publisher site journal article supplement (https://www.dovepress.com/article/601107)
Supplement: Supplementary file 1 [file 601107%20Revised%20%2509Supplementary%20Figure%201.docx]

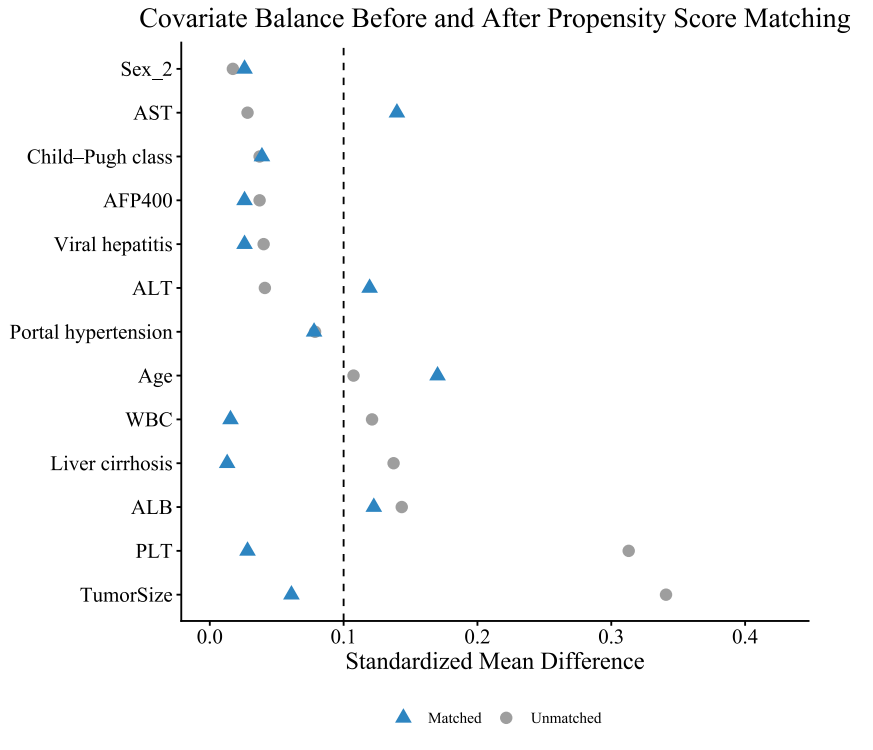


**Supplementary Figure 1.** Covariate balance before and after propensity score matching was assessed using standardized mean differences and visualized with a Love plot. After matching, all covariates achieved adequate balance (SMD < 0.1).
